# Supplementary material for: Flavonoids of Salvadora persica L. (meswak) and its liposomal formulation as a potential inhibitor of SARS-CoV-2
Source: Royal Society of Chemistry journal article supplement (doi:10.1039/d1ra00142f), 2021-01-01

|            |                          |                                                                                   |      |
|------------|--------------------------|-----------------------------------------------------------------------------------|------|
| Researcher | : Dr.Marwa elhawary      | email: <a href="mailto:Marwaelhawary527@yahoo.com">Marwaelhawary527@yahoo.com</a> | mob. |
| Assay      | : MTT cytotoxicity assay |                                                                                   |      |
| Samples    | : 01 compounds.          |                                                                                   |      |
| Cell lines | : ---                    |                                                                                   |      |
| Ref.       | : ---                    |                                                                                   |      |
| Date       | : 28-07-2020             |                                                                                   |      |
| Reader     | : BIOLINE ELIZA READER   | wl 450 nm                                                                         |      |
| Kit used   | : SIGMA chemicals        |                                                                                   |      |
| Solvent    | : DMSO                   |                                                                                   |      |

## Lab REPORT

### \* Cytotoxicity results

| Ser |           |    | Cytotoxicity |
|-----|-----------|----|--------------|
|     |           |    | IC50         |
|     | Sample    |    | A375         |
|     | code      | MW | ug/ml        |
| 1   | Aq/A375   |    | 24.5±1.9     |
| 2   | Docetaxel |    | 7.73±0.6     |

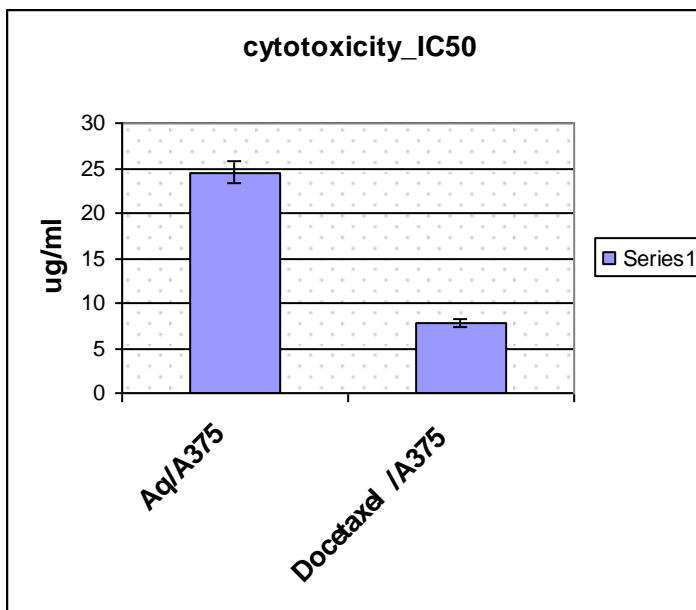

## Assay Protocol

Cell Line cells were obtained from American Type Culture Collection , cells were cultured using DMEM (Invitrogen/Life Technologies) supplemented with 10% FBS (Hyclone, ), 10 ug/ml of insulin (Sigma), and 1% penicillin-streptomycin. All of the other chemicals and reagents were from Sigma, or Invitrogen.

Plate cells (cells density  $1.2 - 1.8 \times 10,000$  cells/well) in a volume of 100 $\mu$ l complete growth medium + 100 ul of the tested compound per well in a 96-well plate for 24 hours before the MTT assay .

### Cell culture protocol

1. Remove culture medium to a centrifuge tube.
2. Briefly rinse the cell layer with 0.25% (w/v) Trypsin 0.53 mM EDTA solution to remove all traces of serum which contains Trypsin inhibitor.
3. Add 2.0 to 3.0 ml of Trypsin EDTA solution to flask and observe cells under an inverted microscope until cell layer is dispersed (usually within 5 to 15 minutes).

Note: To avoid clumping do not agitate the cells by hitting or shaking the flask while waiting for the cells to detach. Cells that are difficult to detach may be placed at 37°C to facilitate dispersal.

4. Add 6.0 to 8.0 mL of complete growth medium and aspirate cells by gently pipetting.
5. Transfer the cell suspension to the centrifuge tube with the medium and cells from step 1, and centrifuge at approximately 125 xg for 5 to 10 minutes. Discard the supernatant.
6. Resuspend the cell pellet in fresh growth medium. Add appropriate aliquots of the cell suspension to new culture vessels.
7. Incubate cultures at 37°C for 24 hrs.

8-After treatment of cells with the serial concentrations of the compound to be tested incubation is carried out for 48 h at 37°C ,then the plates are to be examined under the inverted microscope and proceed for the MTT assay

### MTT - Cytotoxicity assay protocol

The MTT method of monitoring in vitro cytotoxicity is well suited for use with multiwell plates. For best results, cells in the log phase of growth should be employed and final cell number should not exceed  $10^6$  cells/cm<sup>2</sup>. Each test should include a blank containing complete medium without cells.

1. Remove cultures from incubator into laminar flow hood or other sterile work area.
2. Reconstitute each vial of MTT [M-5655] to be used with 3 ml of medium or balanced salt solution without phenol red and serum. Add reconstituted MTT in an amount equal to 10% of the culture medium volume.
3. Return cultures to incubator for 2-4 hours depending on cell type and maximum cell density. (An incubation period of 2 hours is generally adequate but may be lengthened for low cell densities or cells with lower metabolic activity.) Incubation times should be consistent when making comparisons.

4. After the incubation period, remove cultures from incubator and dissolve the resulting formazan crystals by adding an amount of MTT Solubilization Solution [M-8910] equal to the original culture medium volume.

5. Gentle mixing in a gyratory shaker will enhance dissolution. Occasionally, especially in dense cultures, pipetting up and down [trituration] may be required to completely dissolve the MTT formazan crystals.

6. Spectrophotometrically measure absorbance at a wavelength of 450 nm. Measure the background absorbance of multiwell plates at 690 nm and subtract from the 450 nm measurement. Tests performed in multiwell plates can be read using the appropriate type of plate reader or the contents of individual wells may be transferred to appropriate size cuvetts for spectrophotometric measurement.

researcher  
Dr.Marwa Elhawary

assay  
MTT

Date  
28-Jul

cells  
A375

|   | Blank | CC | Sample No. Aq/A375 |      |        |        |        | Sample No. Docetaxel/A375 |      |        |        |        |
|---|-------|----|--------------------|------|--------|--------|--------|---------------------------|------|--------|--------|--------|
|   | 1     | 2  | 3                  | 4    | 5      | 6      | 7      | 8                         | 9    | 10     | 11     | 12     |
| A | B     | C  | 100ug              | 25ug | 6.25ug | 1.56ug | 0.39ug | 100ug                     | 25ug | 6.25ug | 1.56ug | 0.39ug |
| B | B     | C  | 100ug              | 25ug | 6.25ug | 1.56ug | 0.39ug | 100ug                     | 25ug | 6.25ug | 1.56ug | 0.39ug |
| C | B     | C  | 100ug              | 25ug | 6.25ug | 1.56ug | 0.39ug | 100ug                     | 25ug | 6.25ug | 1.56ug | 0.39ug |

ROBONIK P2000 eia reader  
Wave length: 560450 nm  
Reference: 630 nm

|      | 1      | 2     | 3      | 4     | 5      | 6      | 7     | 8     | 9      | 10     | 11    | 12     |
|------|--------|-------|--------|-------|--------|--------|-------|-------|--------|--------|-------|--------|
| A    | 0.001  | 0.471 | 0.196  | 0.241 | 0.288  | 0.319  | 0.362 | 0.162 | 0.194  | 0.243  | 0.292 | 0.345  |
| B    | 0.001  | 0.493 | 0.188  | 0.239 | 0.291  | 0.325  | 0.371 | 0.154 | 0.205  | 0.245  | 0.297 | 0.339  |
| C    | 0.001  | 0.467 | 0.191  | 0.238 | 0.286  | 0.308  | 0.375 | 0.157 | 0.187  | 0.242  | 0.284 | 0.338  |
| mean | 0.0004 | 0.477 | 0.1917 | 0.239 | 0.2883 | 0.3173 | 0.369 | 0.158 | 0.1953 | 0.2433 | 0.291 | 0.3407 |
| %    |        |       | 40.182 | 50.17 | 60.447 | 66.527 | 77.43 | 33.05 | 40.95  | 51.013 | 61.01 | 71.419 |

Aq/A375

| log conc. | % viability |
|-----------|-------------|
| 2         | 40.182      |
| 1.398     | 50.175      |
| 0.796     | 60.447      |
| 0.193     | 66.527      |
| -0.41     | 77.428      |

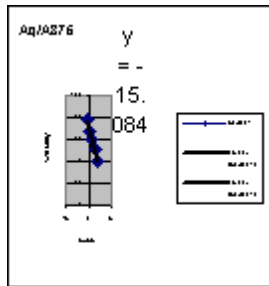

Docetaxel/A375

| log conc. | % viability |
|-----------|-------------|
| 2         | 33.054      |
| 1.398     | 40.95       |
| 0.796     | 51.013      |
| 0.193     | 61.006      |
| -         | 71.419      |

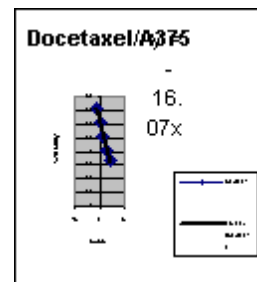

IC50=

IC50=

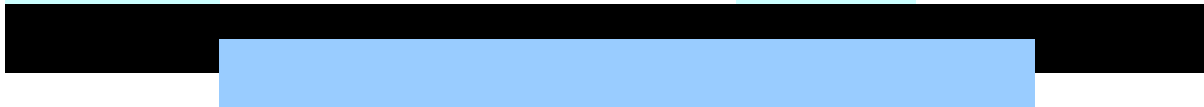

Supplement: d1ra00142f2.pdf [file d1ra00142f2.pdf]
