# Supplementary material for: Flavonoids of Salvadora persica L. (meswak) and its liposomal formulation as a potential inhibitor of SARS-CoV-2
Source: Royal Society of Chemistry journal article supplement (doi:10.1039/d1ra00142f), 2021-01-01

Researcher : Dr.Marwa elhawary email: [Marwaelhawary527@yahoo.com](mailto:Marwaelhawary527@yahoo.com) mob.  
Assay : COV-3CL protease assay  
Samples : 05 compounds.  
Cell line : ---  
Reference : ---  
Date : 28/07/2020  
Kit used : ---  
Reader : TECAN spark reader  
Solvent : DMSO  
Assay samples : ---

## Lab Report

| ser | Compound   |             | Results                           |
|-----|------------|-------------|-----------------------------------|
|     | code       | MW<br>g/mol | COV-3CL protease<br>IC50<br>ug/ml |
| 1   | M Co.w     |             | 4.591±0.21                        |
| 2   | M Co.n     |             | 1.204±0.04                        |
| 3   | Crude      |             | 8.590±0.3                         |
| *** | Remdesivir |             | 0.447±0.02                        |

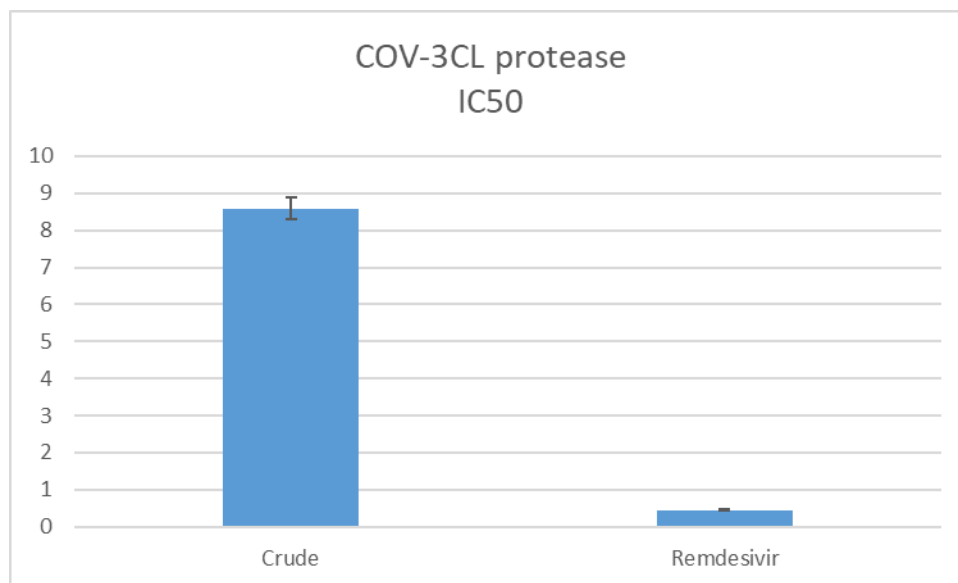

Supplement: d1ra00142f1.pdf [file d1ra00142f1.pdf]
